# Supplementary material
Source: publisher site journal article supplement (https://www.dovepress.com/article/133295)
Supplement: Supplementary file 1 [file get_supplementary_file.php]

---

## Supporting Information

### The interactions of single-wall carbon nanohorns with polar epithelium

Yujie Shi<sup>1</sup>, Zujin Shi<sup>2</sup>, Suxin Li<sup>1</sup>, Yuan Zhang<sup>3</sup>, Bing He<sup>1</sup>, Dong Peng<sup>4</sup>, Jie Tian<sup>4</sup>, Ming Zhao<sup>5</sup>, Xueqing Wang<sup>1</sup>, Qiang Zhang<sup>1</sup>

<sup>1</sup>Beijing Key Laboratory of Molecular Pharmaceutics and New Drug Delivery Systems, School of Pharmaceutical Sciences, <sup>2</sup>Beijing National Laboratory for Molecular Sciences, State Key Lab of Rare Earth Materials Chemistry and Applications, College of Chemistry and Molecular Engineering, Peking University, Beijing, People's Republic of China; <sup>3</sup>Department of Biomedical and Pharmaceutical Sciences, College of Pharmacy, University of Rhode Island, Kingston 02881, USA; <sup>4</sup>Key Laboratory of Molecular imaging of Chinese Academy of Sciences, Institute of Automation, Chinese Academy of Sciences, Beijing, People's Republic of China; <sup>5</sup>Department of Chemical Biology, School of Pharmaceutical Sciences, Peking University, Beijing, People's Republic of China.

Correspondence:

Ming Zhao

Tel +86-10-82801539

E-mail sunmoonzhao@sohu.com

Xueqing Wang

Tel +86-10-82805935

E-mail wangxq@bjmu.edu.cn

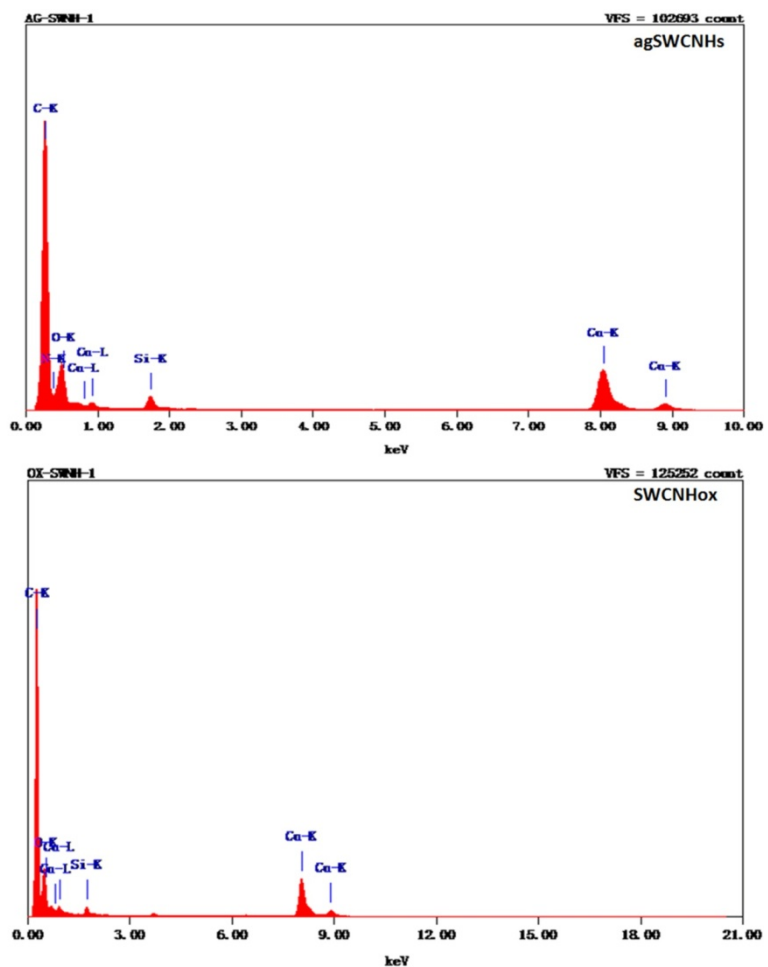

**Figure S1.** The energy dispersive spectrum of agSWCNHs and SWCNHox.

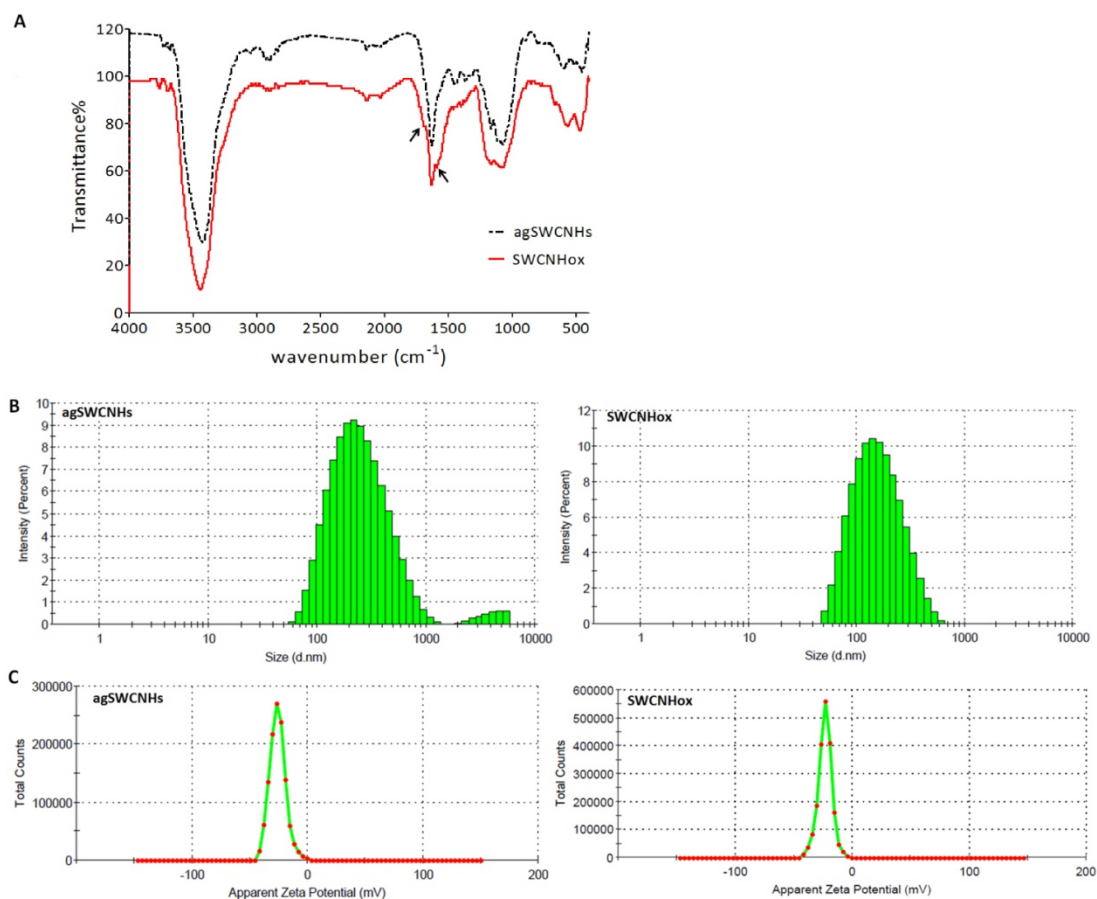

**Figure S2.** A, FTIR spectrum of agSWCNHs and SWCNHox. Black arrows indicate the additional absorption peaks besides the original ones; B, Particle size distribution of suspensions of agSWCNHs and SWCNHox in distilled water with  $10 \text{ mg mL}^{-1}$  BSA as suspending agent by dynamic light scattering analysis; C, Zeta potentials of agSWCNHs and SWCNHox in distilled water with  $10 \text{ mg mL}^{-1}$  BSA as suspending agent.

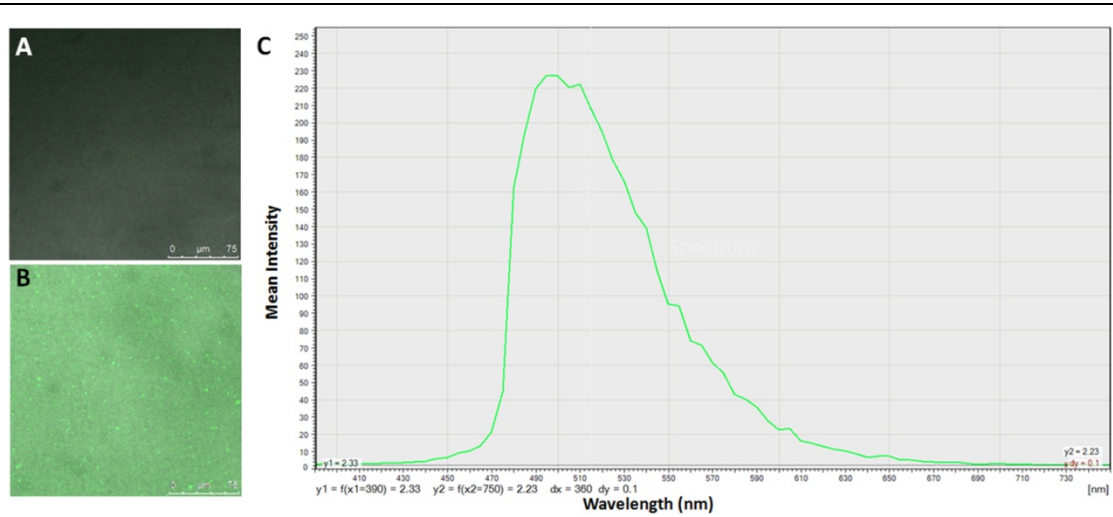

**Figure S3.** Fluorescence CLSM images of DMEM (control, A) and F-B-SWCNHox (B) suspensions in DMEM; (C) Fluorescence spectrum of F-B-SWCNHox in DMEM.

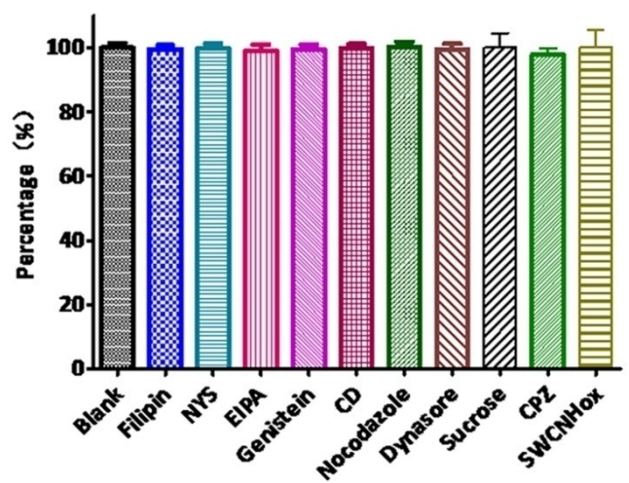

**Figure S4.** Cell viability was detected by CCK-8 assays after incubation with inhibitors and 100  $\mu\text{gml}^{-1}$  SWCNHox for 3h. Untreated cell was used as the control.

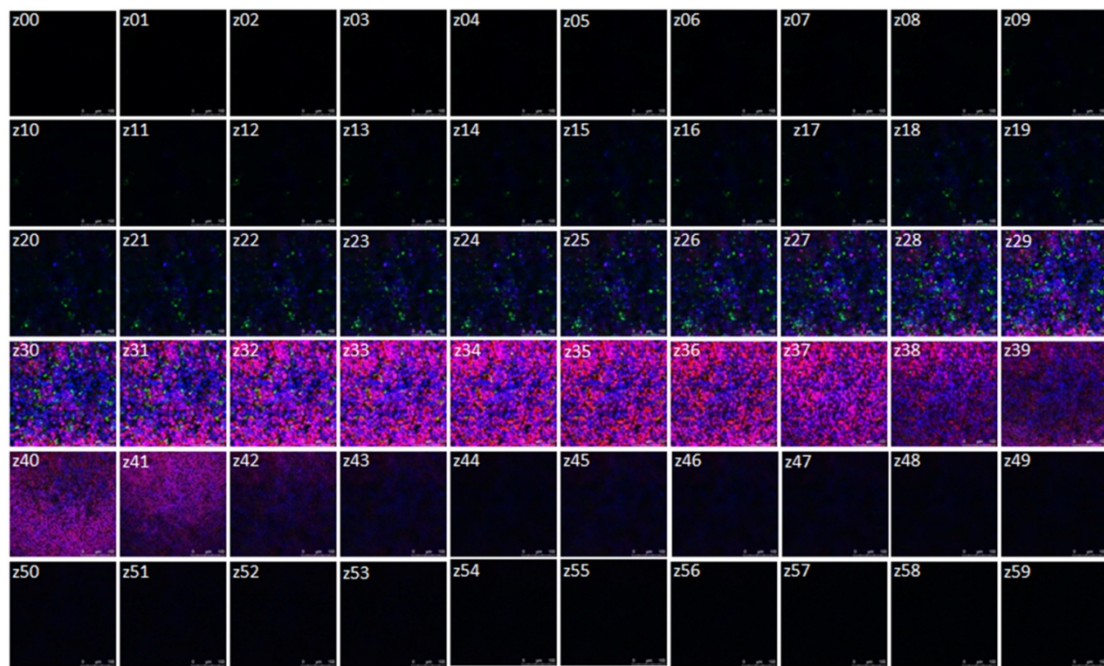

**Figure S5.** Confocal image series of MDCK cell monolayer along the Z-axis after incubation with  $40 \mu\text{g ml}^{-1}$  F-B-SWCNHox suspensions for 12 h at  $37^\circ\text{C}$ . Green represents F-B-SWCNHox, blue represents nuclei, red represents the pseudo-color of transwell membrane.

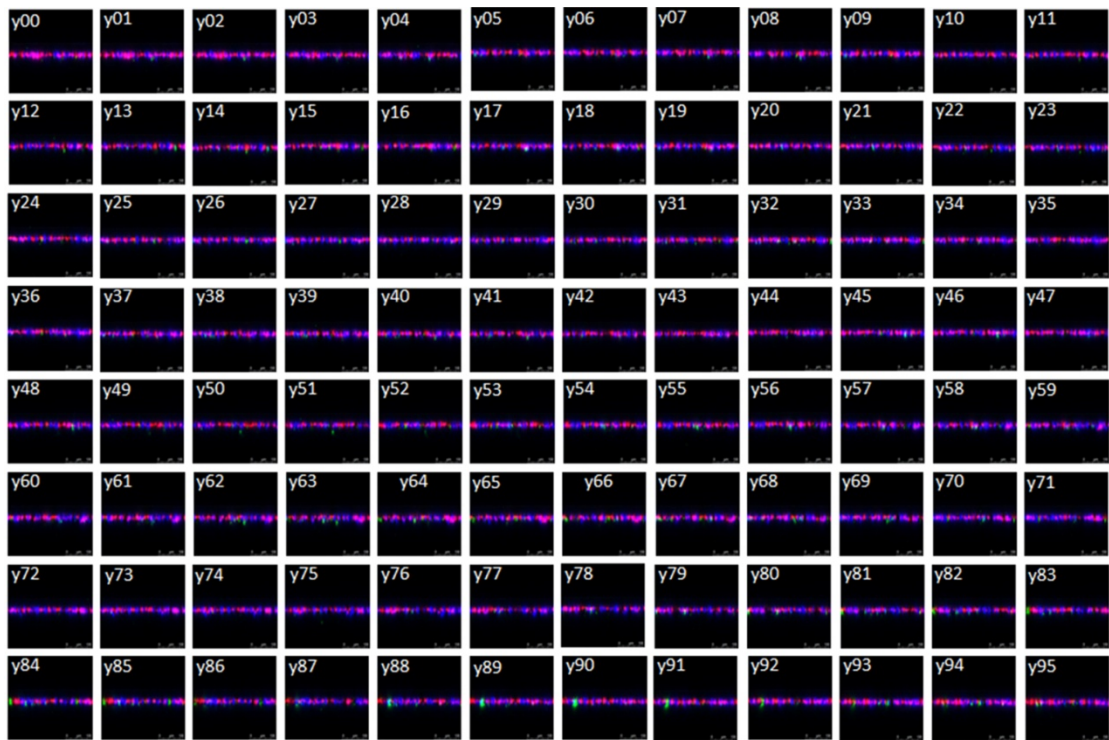

**Figure S6.** Confocal image series of MDCK cell monolayer along the Y-axis after incubation with  $40 \mu\text{g ml}^{-1}$  F-B-SWCNHox suspensions for 12 h at  $37^\circ\text{C}$ . Green represents F-B-SWCNHox, blue represents nuclei, red represents the pseudo-color of transwell membrane.

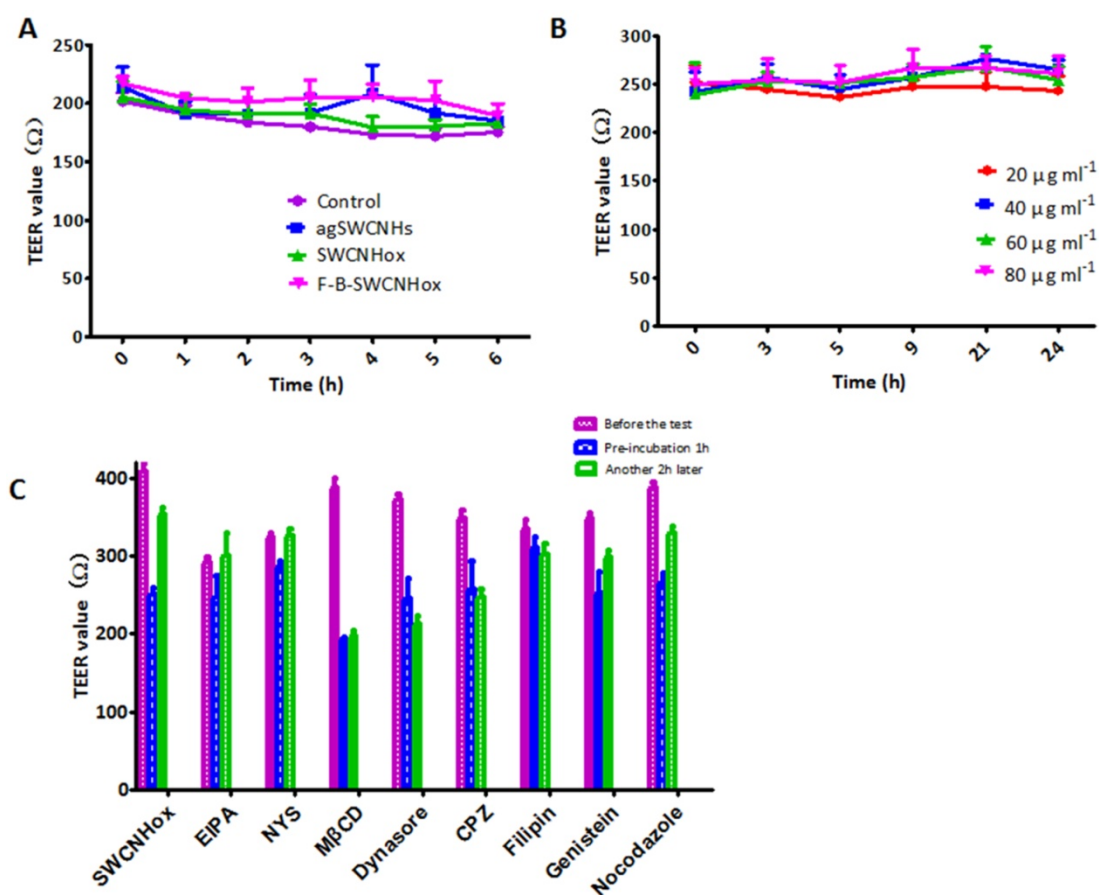

**Figure S7.** The TEER value changes of MDCK cell monolayers incubated with (A) different types of SWCNHs for different time periods at the concentration of 20  $\mu\text{g ml}^{-1}$ , (B) different concentrations of SWCNHox for different time periods, (C) different inhibitors used in endocytosis pathway study, and the influence of 100  $\mu\text{g ml}^{-1}$  SWCNHox on TEER was determined simultaneously.

**Table S1** Results of elemental analysis

| Element assay | C%   | N%    | H%           |
|---------------|------|-------|--------------|
| agSWCNHs      | 95.3 | 4.23  | Not detected |
| SWCNHox       | 91.5 | 0.564 | 0.728        |

---

**Table S2** Characteristics of agSWCNHs and SWCNHox in different media

---

| sample   | Medium         | Centrifugation (rpm) | Time of repose (h) | Particle Size(d.nm) | PDI         |
|----------|----------------|----------------------|--------------------|---------------------|-------------|
| agSWCNHs | water          |                      | 0                  | 2155.3±348.0        | 0.881±0.131 |
| agSWCNHs | water with BSA | 12 thousand          | 0                  | 220.5±10.9          | 0.230±0.019 |
| agSWCNHs | water with BSA | 12 thousand          | 48                 | 210.1±12.1          | 0.308±0.037 |
| agSWCNHs | PBS with BSA   | 12 thousand          | 0                  | 191.4±8.55          | 0.295±0.019 |
| agSWCNHs | PBS with BSA   | 12 thousand          | 48                 | 224.2±14.1          | 0.331±0.004 |
| SWCNHox  | water          |                      | 0                  | 465.4±13.5          | 0.840±0.122 |
| SWCNHox  | water with BSA | 12 thousand          | 0                  | 139.6±2.87          | 0.214±0.01  |
| SWCNHox  | water with BSA | 12 thousand          | 48                 | 183.2±4.05          | 0.270±0.020 |
| SWCNHox  | PBS with BSA   | 12 thousand          | 0                  | 161.3±9.77          | 0.265±0.027 |
| SWCNHox  | PBS with BSA   | 12 thousand          | 48                 | 239.0±1.38          | 0.270±0.020 |

---
